# Supplementary material
Source: publisher figshare collection journal article supplement (https://acs.figshare.com/ndownloader/files/16263470)
Supplement: Supplementary file 1 [file 16263470]

## **Supporting Information**

### **Design of an Air-Cooled Sabatier Reactor for Thermocatalytic Hydrogenation of CO<sub>2</sub>: Experimental Proof-of-Concept and Model-Based Feasibility Analysis**

Robert Currie, Sogol Mottaghi-Tabar, Yichen Zhuang and David S. A. Simakov\*

*Department of Chemical Engineering, University of Waterloo, Waterloo ON N2L 3G1, Canada*

## 1. Reaction rate expressions

A Ni/Al<sub>2</sub>O<sub>3</sub> catalyst was selected for the reaction (packed bed) compartment. Reaction rate expressions from the literature were implemented, eqs S1-S3.<sup>1</sup> These kinetic expressions, although originally developed for methane steam reforming, account for the reversibility of all reactions involved. Therefore, it is expected that eqs S1-S3 can describe the Sabatier-CO methanation-reverse water gas shift reaction system described by eqs S1-S3. This assumption was experimentally validated using a commercial Ni catalyst (12 wt% Ni/Al<sub>2</sub>O<sub>3</sub>, BASF, supplied by Research Catalysts, Inc. USA); kinetic parameters were estimated through the non-linear least squares regression.

$$R_1 = \frac{k_1}{p_{H_2}^{2.5}} \left( p_{CH_4} p_{H_2O} - \frac{p_{H_2}^3 p_{CO}}{K_{1,eq}} \right) \frac{1}{den^2} \quad (S1)$$

$$R_2 = \frac{k_2}{p_{H_2}} \left( p_{CO} p_{H_2O} - \frac{p_{H_2} p_{CO_2}}{K_{2,eq}} \right) \frac{1}{den^2} \quad (S2)$$

$$R_3 = \frac{k_3}{p_{H_2}^{3.5}} \left( p_{CH_4} p_{H_2O}^2 - \frac{p_{H_2} p_{CO_2}}{K_{3,eq}} \right) \frac{1}{den^2} \quad (S3)$$

$$den = 1 + K_{CO} p_{CO} + K_{H_2} p_{H_2} + K_{CH_4} p_{CH_4} + \frac{K_{H_2O} p_{H_2O}}{p_{H_2}}$$

$$k_j = A_j \exp\left(\frac{-E_j}{R_g T}\right) \quad K_i = B_i \exp\left(\frac{-\Delta H_i}{R_g T}\right) \quad K_{j,eq} = B_j \exp\left(\frac{-\Delta H_j}{R_g T}\right)$$

## 2. Estimation of kinetic parameters

To estimate the parameters in eqs S1-S3 ( $A_j$ ,  $E_j$ ,  $B_i$  and  $\Delta H_i$ , total 14 parameters), a set of lab experiments were carried out to monitor the change in species concentrations as a function of temperature and space velocity. CO<sub>2</sub> and H<sub>2</sub> were fed by mass flow controllers to a flow reactor containing 0.5g of the catalyst (12 wt% Ni/Al<sub>2</sub>O<sub>3</sub>, BASF, supplied by Research Catalysts, Inc. USA), with the outlet concentrations monitored using an infrared analyzer (IR-208, Infrared Industries). Parameter estimation was done by minimizing the sum of the squared residuals of the CO<sub>2</sub>, CO and CH<sub>4</sub> concentrations by means of the Trust-Region Reflective Algorithm.<sup>2</sup> Simulated mole fractions were obtained by integrating a set of ordinary differential equations (MATLAB ode15s) described by eq S4:

$$\varepsilon \frac{dC_i}{dt} = -\varepsilon v_g \frac{(C_i - C_{i,f})}{L} + \rho_c (1 - \varepsilon) \sum_j \alpha_j R_{ij} \quad (\text{S4})$$

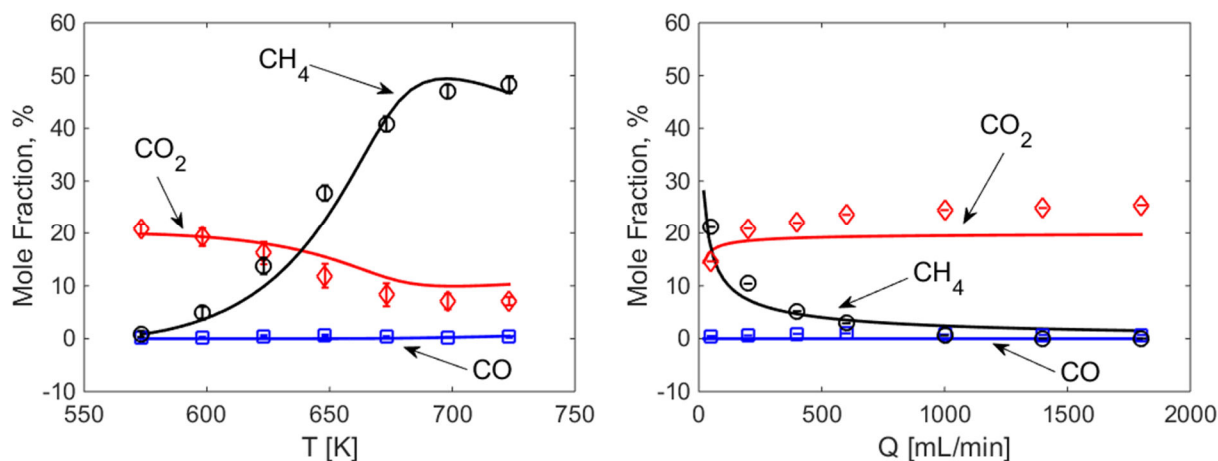

**Figure S1.** Parameter estimation results, showing the experimentally measured mole fractions (solid lines) and the model prediction (symbols) obtained by integrating eq S4 using the estimated parameters (listed in Table S2).

Equation S4 represents the time evolution of all species participating in the reaction system in a kinetic flow reactor. Initial guesses for the reaction and adsorption constants were adopted from Xu and Froment.<sup>1, 3</sup> The parameter estimation results are shown in Figure S1, with the estimated parameters listed in Table S2. As it can be seen from Figure S1, the adopted rate expressions with the estimated parameters listed in Table S2 satisfactorily predicts the experimentally measured mole fractions of CO<sub>2</sub>, CO and CH<sub>4</sub>. Note that the parameter estimation predicts that CH<sub>4</sub> formation pathway is reverse water gas shift with subsequent methanation rather than direct methanation of CO<sub>2</sub>.

**Table S2.** Estimated kinetic parameters.

| A <sub>1</sub> | A <sub>2</sub> | A <sub>3</sub> | B <sub>CO</sub>  | B <sub>H<sub>2</sub></sub>  | B <sub>CH<sub>4</sub></sub>  | B <sub>H<sub>2</sub>O</sub>  |
|----------------|----------------|----------------|------------------|-----------------------------|------------------------------|------------------------------|
| 8.90e8         | 3.42e6         | 9.22e-5        | 1.50e-9          | 1.86e-12                    | 5.48e-7                      | 6.43e3                       |
| E <sub>1</sub> | E <sub>2</sub> | E <sub>3</sub> | ΔH <sub>CO</sub> | ΔH <sub>H<sub>2</sub></sub> | ΔH <sub>CH<sub>4</sub></sub> | ΔH <sub>H<sub>2</sub>O</sub> |
| 122.4          | 93.1           | 104.8          | -97.3            | -103.4                      | -57.7                        | 104.4                        |

Units of activation energies and adsorption enthalpies are kJ/mol. A<sub>1</sub> and A<sub>2</sub> have units of (mol kPa<sup>0.5</sup>)/(kg s). Units of A<sub>3</sub> are mol/(kPa kg s).

### 3. Transport parameters

Intraparticle and interphase mass and heat transfer limitations were assessed using the following criteria:<sup>4-5</sup>

$$\phi_j^2 = \frac{\hat{k}_j d_p^2}{4D_m} \ll 1 \quad (\text{S5})$$

$$\frac{\varepsilon \rho_g |\Delta H_{RWGS}| \hat{k}_j d_p^2}{4 k_s T} \ll \frac{0.75 TR_g}{E_a} \quad (S6)$$

$$\frac{\hat{k}_j d_p}{2 y_{CO_2, f} k_c} \ll 0.15 \quad (S7)$$

$$\frac{\varepsilon \rho_g |\Delta H_{RWGS}| \hat{k}_j d_p}{2 h_{gs} T} \ll \frac{0.75 TR_g}{E_a} \quad (S8)$$

$$\hat{k}_1 = \frac{k_1 \rho_s (1 - \varepsilon)}{\sqrt{P_{tf}} \rho_g \varepsilon} \quad \hat{k}_2 = \frac{k_2 \rho_s (1 - \varepsilon) P_{tf}}{\rho_g \varepsilon} \quad \hat{k}_3 = \frac{k_3 \rho_s (1 - \varepsilon)}{\sqrt{P_{tf}} \rho_g \varepsilon}$$

In the equations above,  $k_s$  is the thermal conductivity of the pellet which was assumed to be the same as for alumina and calculated using an empirical correlation.<sup>6</sup> The gas mass transfer coefficient ( $k_c$ ) was calculated from the Sherwood number, estimated by the Frossling correlation,<sup>7</sup> [eq S9](#). The effective gas heat transfer coefficient ( $h_{gs}$ ) was calculated from the Nusselt number, estimated by the analogous correlation for heat transfer,<sup>8</sup> [eq S10](#).

$$Sh = \frac{k_c d_p}{D_m} = 2 + 0.6 Re^{0.5} Sc^{\frac{1}{3}} \quad Re_p = \frac{v_g \rho_g d_p}{\mu_g} \quad Sc = \frac{\nu}{D_m} \quad (S9)$$

$$Nu_p = \frac{h_{gs} d_p}{k_t} = 2 + 0.6 Re^{0.5} Pr^{\frac{1}{3}} \quad Pr = \frac{\nu}{\alpha_t} \quad (S10)$$

Under relevant conditions (600-800 K, 5-10 bar, gas velocity of 0.04-0.2 m/s), and using previously estimated kinetic parameters, it was shown that interparticle and interphase transport limitations are negligible for methanation reactions. On the other hand, for the reverse water gas shift reaction the intraparticle mass transfer resistance was found to be significant. To account for

that transport limitation the internal effectiveness factor was calculated (for all reactions), using the standard expression for a spherical pellet:<sup>9</sup>

$$\eta_j = \frac{3}{\phi_j} \left( \frac{1}{\tanh \phi_j} - \frac{1}{\phi_j} \right) \quad \phi_j = \sqrt{\frac{\hat{k}_j d_p^2}{4D_m}} \quad (\text{S11})$$

Axial mass and heat dispersion in a packed bed were accounted for through the following correlations:

$$D_{ae} = \varepsilon \left( \frac{D_m}{\tau_b} + 0.5 d_p v_g \right) \quad \tau_b = \frac{1}{\varepsilon^{0.5}} \quad (\text{S12})$$

$$k_{ae} = \lambda_g \left( 8 + 0.05 \text{Re}_p^{1.09} \right) \quad (\text{S13})$$

The effective axial mass dispersion coefficient, [eq S12](#), was calculated using a typical correlation adopted from the literature.<sup>10</sup> The expression for the effective axial heat dispersion coefficient, [eq S13](#), was derived from the heat conductivity correlations developed for catalytic fixed beds,<sup>11-12</sup> by plotting  $k_{ae}$  vs.  $\text{Re}_p$  in the relevant range and least squares fitting.<sup>13</sup>

Wall heat transfer coefficients for heat exchange between the packed bed and cooling tube, [eq S14](#), and heat loss to the environment, [eq S15](#), were calculated by resistances in series. These parameters account for the contribution of the packed bed ( $h_{wr}$ ), cooling tube or reactor wall ( $\lambda_w$ ), molten salt ( $h_{wc}$ ), insulation layer ( $\lambda_{iw}$ ), and natural convection from the external reactor surface ( $h_{nc}$ ).

$$U_{w,HE} = \left( \frac{1}{h_{wr}} + \frac{d_w}{\lambda_w} + \frac{1}{h_{wc}} \right)^{-1} \quad (\text{S14})$$

$$U_{w,HL} = \left( \frac{1}{h_{wr}} + \frac{d_w}{\lambda_w} + \frac{d_{iw}}{\lambda_{iw}} + \frac{1}{h_{nc}} \right)^{-1} \quad (S15)$$

The effective wall heat transfer coefficient for the reaction compartment ( $h_{wr}$ ) was estimated using the following correlation:

$$Nu_p = \frac{h_{wr} d_p}{\lambda_g} = 24 + 0.34 Re_p^{0.77} \quad (S16)$$

This expression was obtained in the similar way as [eq S13](#), using a complete set of the original correlations<sup>11-12</sup> and least squares fitting.<sup>13</sup> The effective wall heat transfer coefficient for the coolant tube ( $h_{wc}$ ) was estimated using the following correlations from the literature:<sup>14-16</sup>

$$Re_c < 2030 \quad Nu_c = 3.66 + \frac{0.065 Re_c Pr_c (D_c / L)}{1 + 0.04 [Re_c Pr_c (D_c / L)]^{2/3}} \quad (S17)$$

$$2030 < Re_c < 4000 \quad Nu_c = 0.012 (Re_c^{0.87} - 280) Pr_c^{0.4} \left[ 1 + (D_c / L)^{2/3} \right] \quad (S18)$$

$$Re_c > 4000 \quad Nu_c = 0.027 Re_c^{0.8} Pr_c^{1/3} \quad (S19)$$

$$Nu_c = \frac{h_{wc} D_c}{\lambda_c} \quad Re_c = \frac{v_c \rho_c D_c}{\mu_c} \quad Pr_c = \frac{C_{pc} \mu_c}{\lambda_c}$$

The values for the insulation layer (quartz wool) conductivity ( $\lambda_{iw}$ ) and natural convection ( $h_{nc}$ ) were adopted from the literature.<sup>17-18</sup> These contributions were dominant in [eq S15](#) and the wall heat loss coefficient was nearly constant in all simulations:  $U_{w,HL} \approx 0.01 \text{ W}/(\text{m}^2 \text{ K})$ .

#### 4. Conversion, selectivity and carbon balance derivation

CO<sub>2</sub> conversion ( $X_{CO_2}$ ) and CH<sub>4</sub> selectivity ( $S_{CH_4}$ ) were obtained from the following equations ( $y_{CO_2}$ ,  $y_{CO}$ , and  $y_{CH_4}$  are mole fractions on dry basis):

$$X_{CO_2} = \frac{y_{CO} + y_{CH_4} - \beta(y_{CO} + y_{CO_2} + y_{CH_4})}{(1 - \beta)(y_{CO} + y_{CO_2} + y_{CH_4})} \quad (S20)$$

$$S_{CH_4} = \frac{y_{CH_4} - \beta(y_{CO} + y_{CO_2} + y_{CH_4})}{y_{CO} + y_{CH_4} - \beta(y_{CO} + y_{CO_2} + y_{CH_4})} \quad (S21)$$

To obtain eqs S20 and S21, CO<sub>2</sub> conversions to CO, eq S22, and to CH<sub>4</sub>, eq 23, are first defined:

$$f_1 = \frac{y_{CO}}{(1 - \beta)(y_{CO} + y_{CO_2} + y_{CH_4})} \equiv \frac{F_{CO,out}}{F_{CO_2,f}} \quad (S22)$$

$$f_2 = \frac{y_{CH_4} - \beta(y_{CO} + y_{CO_2} + y_{CH_4})}{(1 - \beta)(y_{CO} + y_{CO_2} + y_{CH_4})} \equiv \frac{F_{CH_4,gen}}{F_{CO_2,f}} \quad (S23)$$

$\beta$  is the CH<sub>4</sub> content in the carbon-based feed, as defined in eq S24:

$$\beta = \frac{F_{CH_4,f}}{F_{CH_4,f} + F_{CO_2,f}} = \frac{F_{CH_4,f}}{F_{C,f}} \quad (S24)$$

The total CO<sub>2</sub> conversion and CH<sub>4</sub> selectivity are then obtained as follows:

$$X_{CO_2} = f_1 + f_2 \quad (S25)$$

$$S_{CH_4} = \frac{f_2}{f_1 + f_2} \quad (S26)$$

Carbon balance (CB) is defined as the total rate of carbon fed to the reactor divided by the rate of carbon exiting the reactor:

$$CB = (y_{CO_2} + y_{CO} + y_{CH_4})(1 + \alpha - f_1 - 4f_2 + \gamma)(1 - \beta) \quad (S27)$$

In eq S27, the feed H<sub>2</sub>:CO<sub>2</sub> ratio ( $\alpha$ ) and feed CH<sub>4</sub>:CO<sub>2</sub> ratio ( $\gamma$ ) are defined as follows:

$$\alpha = \frac{F_{H_2,f}}{F_{CO_2,f}} \quad (S28)$$

$$\gamma = \frac{F_{CH_4,f}}{F_{CO_2,f}} \quad (S29)$$

To obtain eq S27, the carbon balance definition, eq S30, is expressed in terms of above-mentioned definitions using the total outlet flow rate  $F_{t,out}$  defined by eq S31:

$$CB = \frac{F_{C,out}}{F_{C,f}} = \frac{(y_{CO_2} + y_{CO} + y_{CH_4})F_{t,out}}{F_{CO_2,f} / (1 - \beta)} \quad (S30)$$

$$F_{t,out} = F_{CO_2,f} + [F_{H_2,f} - F_{CO,out} - 4(F_{CH_4,out} - F_{CH_4,f})] + F_{CH_4,f} \quad (S31)$$

$F_{CO,out}$  and  $F_{CH_4,out}$  in eq S31 correspond to the  $H_2$  consumption in the RWGS and Sabatier reactions.

## NOMENCLATURE

|              |                                                                                      |
|--------------|--------------------------------------------------------------------------------------|
| $a_{c,HE}$   | cooling tube surface-to-volume ratio, $m^{-1}$                                       |
| $a_{r,HE}$   | cooling tube surface-to-packed volume ratio, $m^{-1}$                                |
| $a_{r,HL}$   | reactor surface-to-volume ratio, $m^{-1}$                                            |
| $A_c$        | total cross-sectional area of cooling tubes, $m^2$                                   |
| $A_j$        | pre-exponential factor of the rate coefficient of reaction $j$ , units of $k_j$      |
| $B_j$        | pre-exponential factor of the adsorption coefficient of species $i$ , units of $K_j$ |
| $C_i$        | molar concentration of species $i$ , $mol/m^3$                                       |
| $C_t$        | total molar concentration, $mol/m^3$                                                 |
| $C_{pc}$     | coolant heat capacity, $kJ/(kg\ K)$                                                  |
| $C_{pg}$     | gas heat capacity, $kJ/(mol\ K)$                                                     |
| $d$          | wall thickness, $m$                                                                  |
| $d_p$        | catalytic pellet diameter, $m$                                                       |
| $D$          | diameter, $m$                                                                        |
| $D_{ae}$     | effective axial diffusion coefficient, $m^2/s$                                       |
| $D_m$        | gas molecular diffusivity, $m^2/s$                                                   |
| $E_j$        | activation energy of reaction $j$ , $kJ/mol$                                         |
| $G_c$        | gravimetric (mass) flow rate of coolant, $kg/s$                                      |
| $h_{nc}$     | natural convection heat transfer coefficient, $kJ/(m^2\ s\ K)$                       |
| $h_w$        | effective wall heat transfer coefficient, $kJ/(m^2\ s\ K)$                           |
| $\Delta H_i$ | adsorption enthalpy change of species $i$ , $kJ/mol$                                 |
| $k_{ae}$     | effective axial thermal conductivity, $kJ/(m\ s\ K)$                                 |
| $k_j$        | rate constant of reaction $j$                                                        |

|            |                                                                           |
|------------|---------------------------------------------------------------------------|
| $K_i$      | adsorption constant of species $i$ , bar <sup>-1</sup>                    |
| $K_{j,eq}$ | equilibrium constant of reaction $j$                                      |
| $L$        | reactor length, m                                                         |
| $Nu$       | Nusselt number                                                            |
| $p_i$      | partial pressure of gaseous species $i$ , bar                             |
| $P_t$      | reactor pressure, bar                                                     |
| $Pr$       | Prandtl number                                                            |
| $P_{ff}$   | total feed gas pressure, bar                                              |
| $Re$       | Reynolds number                                                           |
| $R_j$      | rate of reaction $j$ , mol/(kg s)                                         |
| $R_g$      | gas constant, kJ/(mol K)                                                  |
| $SV$       | space velocity, h <sup>-1</sup>                                           |
| $t$        | time, s                                                                   |
| $T$        | reactor temperature, K                                                    |
| $T_c$      | coolant temperature, K                                                    |
| $T_e$      | environment temperature, K                                                |
| $U_w$      | overall effective wall heat transfer coefficient, kJ/(m <sup>2</sup> s K) |
| $v_g$      | gas velocity, m/s                                                         |
| $V$        | compartment volume, m <sup>3</sup>                                        |
| $z$        | reactor length coordinate, m                                              |

***Greek letters***

|               |                                                           |
|---------------|-----------------------------------------------------------|
| $\alpha_{ij}$ | stoichiometric coefficient of species $i$ in reaction $j$ |
| $\varepsilon$ | catalyst bed porosity                                     |
| $\phi$        | Thiele modulus                                            |
| $\eta_j$      | effectiveness factor of reaction $j$                      |

|           |                                       |
|-----------|---------------------------------------|
| $\lambda$ | thermal conductivity, kW/(m K)        |
| $\mu$     | viscosity, kg/(m s)                   |
| $\rho_c$  | coolant density, kg/m <sup>3</sup>    |
| $\rho_g$  | gas molar density, mol/m <sup>3</sup> |
| $\rho_s$  | solid density, kg/m <sup>3</sup>      |
| $\tau_b$  | catalyst bed tortuosity               |

### ***Subscripts***

|            |                    |
|------------|--------------------|
| <i>air</i> | compressed air     |
| <i>c</i>   | coolant            |
| <i>eff</i> | effective          |
| <i>eq</i>  | equilibrium        |
| <i>f</i>   | feed               |
| <i>g</i>   | gas                |
| <i>HE</i>  | heat exchange      |
| <i>HL</i>  | heat loss          |
| <i>int</i> | initial            |
| <i>nc</i>  | natural convection |
| <i>out</i> | outlet             |
| <i>p</i>   | pellet             |
| <i>s</i>   | solid              |
| <i>MS</i>  | molten salt        |
| <i>r</i>   | reactor            |

### ***Abbreviations***

|     |                       |
|-----|-----------------------|
| LFG | landfill gas          |
| PtG | power-to-gas          |
| RNG | renewable natural gas |
| TOS | time-on-stream        |

## References

1. Xu, J. G.; Froment, G. F., Methane Steam Reforming, Methanation and Water-Gas Shift: 1. Intrinsic Kinetics. *AIChE J.* **1989**, 35 (1), 88-96.
2. Wu, S. H.; McAuley, K. B.; Harris, T. J., Selection of Simplified Models: II. Development of a Model Selection Criterion Based on Mean Squared Error. *Can. J. Chem. Eng.* **2011**, 89 (2), 325-336.
3. Elnashaie, S. S. E. H.; Adris, A. M.; Alubaid, A. S.; Soliman, M. A., On the Non-Monotonic Behavior of Methane Steam Reforming Kinetics. *Chem. Eng. Sci.* **1990**, 45 (2), 491-501.
4. Simakov, D. S. A.; Luo, H. Y.; Román-Leshkov, Y., Ultra-low loading Ru/ $\gamma$ -Al<sub>2</sub>O<sub>3</sub>: A highly active and stable catalyst for low temperature solar thermal reforming of methane. *Appl. Catal. B: Environ.* **2015**, 168-169, 540-549.
5. Mears, D. E., Tests for Transport Limitations in Experimental Catalytic Reactors. *Ind. Eng. Chem. Process Des. Dev.* **1971**, 10 (4), 541-&.
6. Morrell, R., *Handbook of Properties of Technical & Engineering Ceramics*. Her Majesty's Stationery Office: London, 1985.
7. Frössling, N., Über die Verdunstung fallender Tropfen. *Gerlands Beitr. Geophys.* **1938**, 52, 170-216.
8. Ranz, W. E.; Marshall, W. R., Evaporation from Droplets: part I and II. *Chem. Eng. Prog.* **1952**, 48, 141-173.
9. Froment, G. F.; Bischoff, K. B., *Chemical Reactor Analysis and Design*. Wiley: 1979.
10. Berger, R. J.; Perez-Ramirez, J.; Kapteijn, F.; Moulijn, J. A., Catalyst Performance Testing - Radial and Axial Dispersion Related to Dilution in Fixed-Bed Laboratory Reactors. *Appl. Catal. A-Gen.* **2002**, 227 (1-2), 321-333.
11. Derkx, O. R.; Dixon, A. G., Effect of the Wall Nusselt Number on the Simulation of Catalytic Fixed Bed Reactors. *Catal. Today* **1997**, 35 (4), 435-442.
12. Dixon, A. G.; Cresswell, D. L., Theoretical Prediction of Effective Heat-Transfer Parameters in Packed-Beds. *AIChE J.* **1979**, 25 (4), 663-676.
13. Sun, D.; Simakov, D. S. A., Thermal Management of a Sabatier Reactor for CO<sub>2</sub> Conversion into CH<sub>4</sub>: Simulation-Based Analysis. *J. CO<sub>2</sub> Util.* **2017**, 21, 368-382.
14. Gnielinski, V., New Equations for Heat and Mass-Transfer in Turbulent Pipe and Channel Flow. *Int. Chem. Eng.* **1976**, 16 (2), 359-368.
15. Holman, J. P., *Heat transfer*. 9 ed.; McGraw-Hill: New York, 2002.
16. Mills, A. F., *Heat Transfer*. Irwin: 1992.
17. Sergeev, O. A.; Shashkov, A. G.; Umanskii, A. S., Thermophysical Properties of Quartz Glass. *J. Eng. Phys. Thermophys.* **1982**, 43 (6), 1375-1383.
18. Churchill, S. W.; Chu, H. H. S., Correlating Equations for Laminar and Turbulent Free Convection from a Horizontal Cylinder. *Int. J. Heat Mass Transfer* **1975**, 18 (9), 1049-1053.
